# Supplementary material for: Intra-articular injections of platelet-rich plasma vs. hyaluronic acid in patients with knee osteoarthritis: Preliminary follow-up results at 6-months
Source: PubMed Central journal article supplement — Exp Ther Med. 2021 Apr 11;21(6):598. doi: 10.3892/etm.2021.10030 (PMC8056115; doi:10.3892/etm.2021.10030), 2021-04-11
Supplement: Supplementary_Data1.pdf [file Supplementary_Data1.pdf]

Video S1. Intra-articular injection of platelet-rich plasma. Following iodopovidone-based disinfection, the skin was sterilely dressed, and 3.5 ml PRP was slowly injected into the knee joint through a 21-gauge needle.
